# Supplementary material
Source: publisher site journal article supplement (https://www.dovepress.com/article/375231)

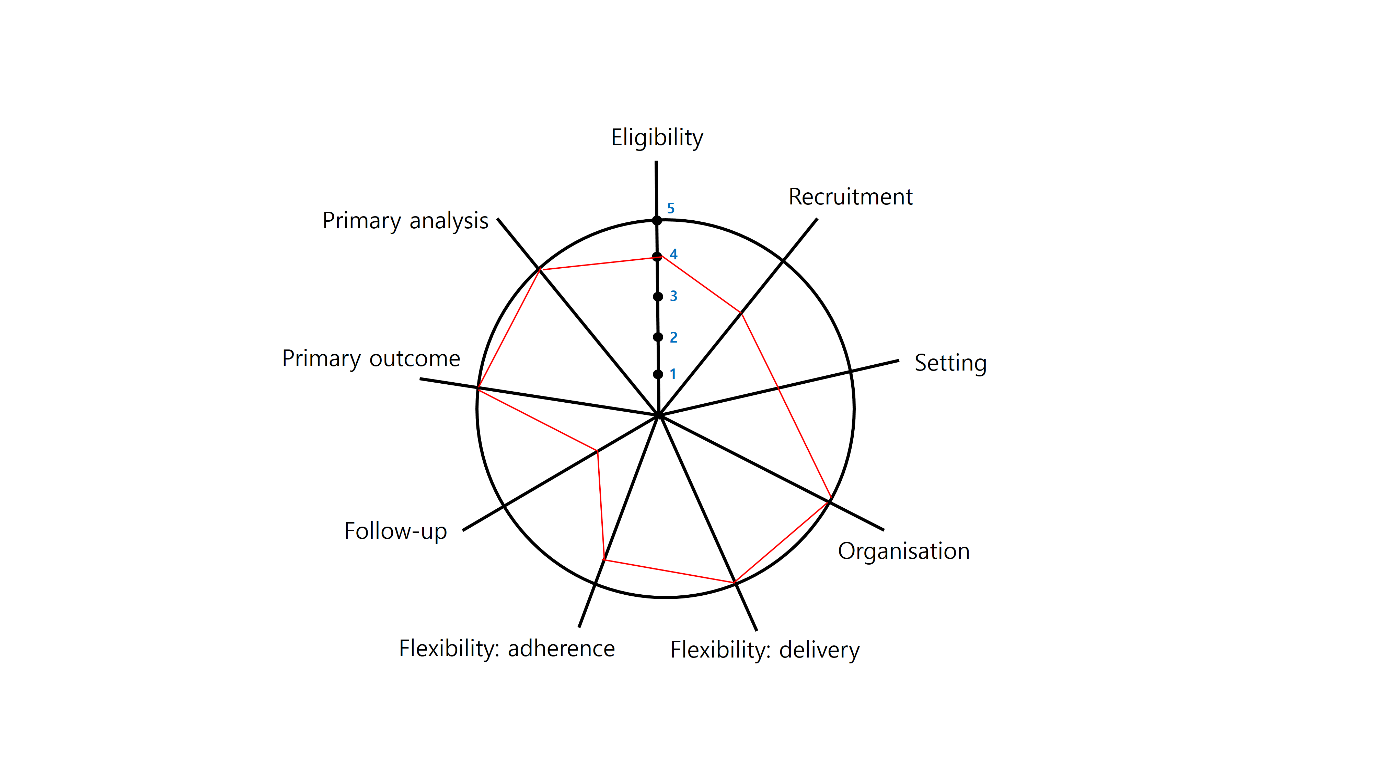


Figure S1: PRECIS-2 wheel of protocol


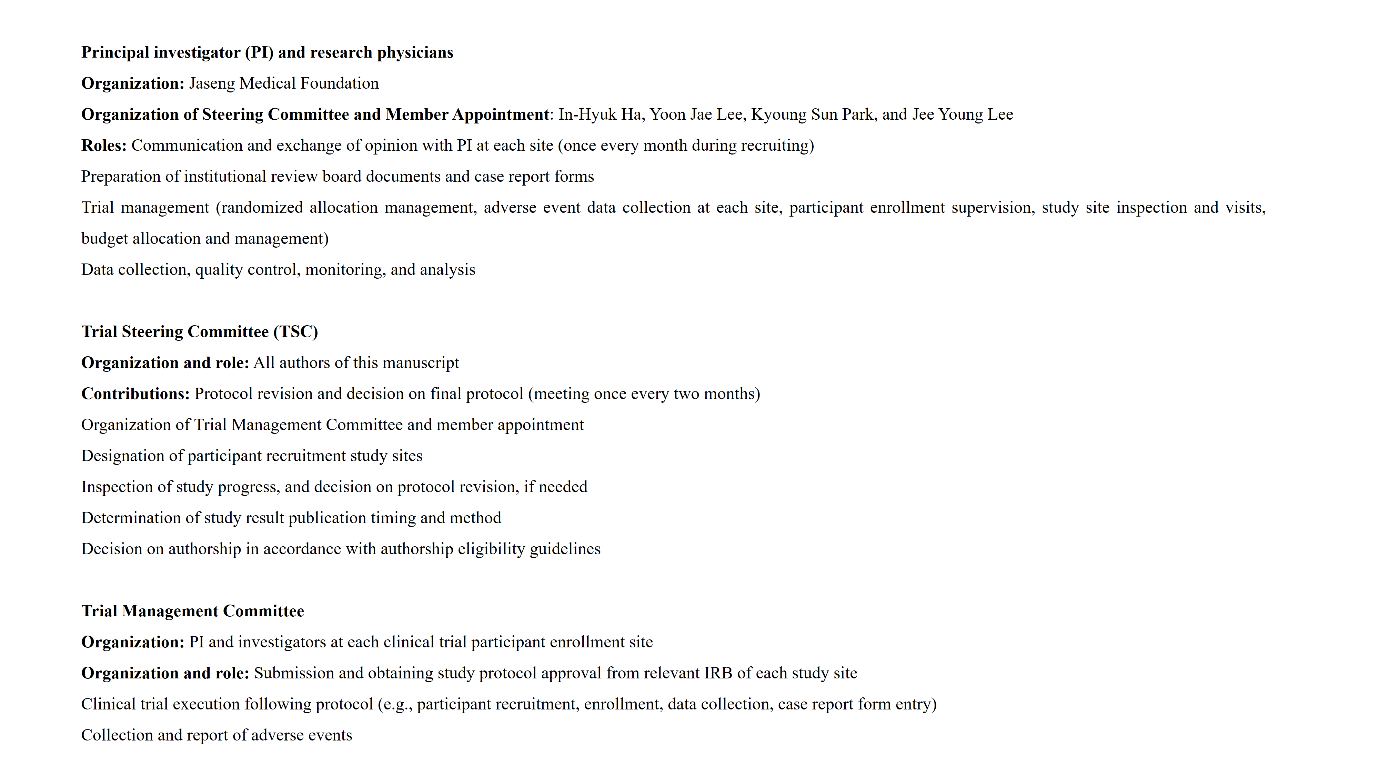


Figure S2: Trial committee organization and roles

Supplement: Supplementary file 1 [file get_supplementary_file.php]
